# Supplementary material
Source: MDPI journal article supplement (https://www.mdpi.com/2313-0105/4/2/14)
Supplement: s1 [file s1]

# On-Demand Micro-Power Generation from an Origami-Inspired Paper Biobattery Stack

Maedeh Mohammadifar <sup>1</sup>, and Seokheun Choi <sup>1, \*</sup>

<sup>1</sup> Bioelectronics & Microsystems Laboratory, Department of Electrical & Computer Engineering, State University of New York-Binghamton, Binghamton, NY 13902, USA

\* Correspondence: [sechoi@binghamton.edu](mailto:sechoi@binghamton.edu)

Received: 9 February 2018; Accepted: 16 March 2018; Published: 21 March 2018

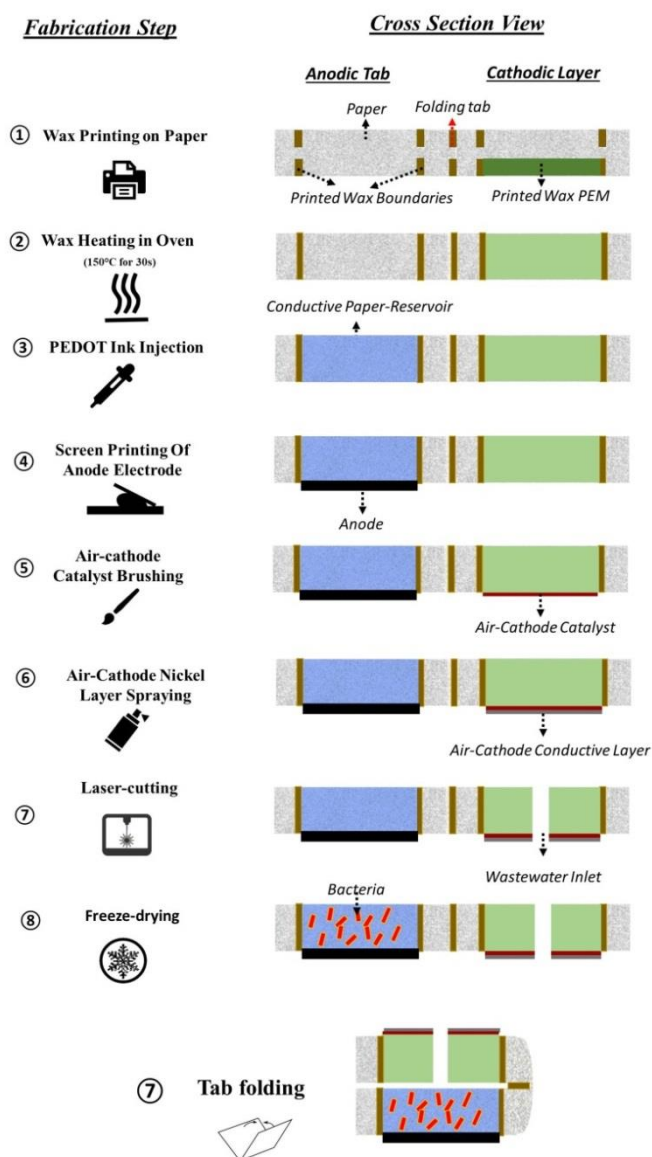

Figure S1. Fabrication processes of the single MFC unit

**(a) Cathode layer of the MFC**

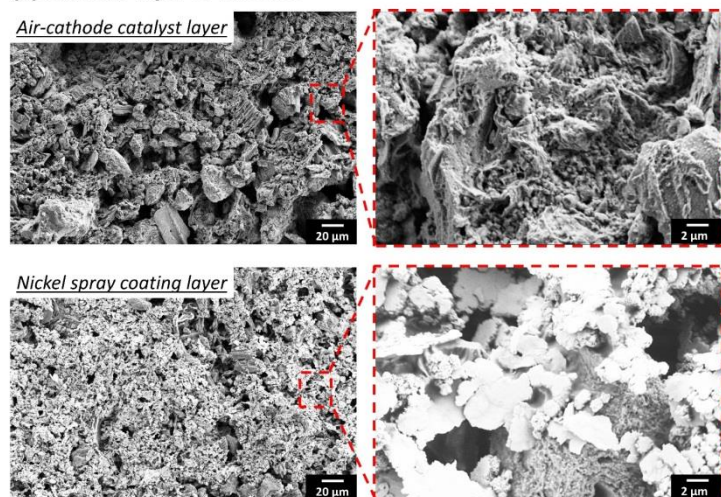

**(b) Anode layer of the MFC**

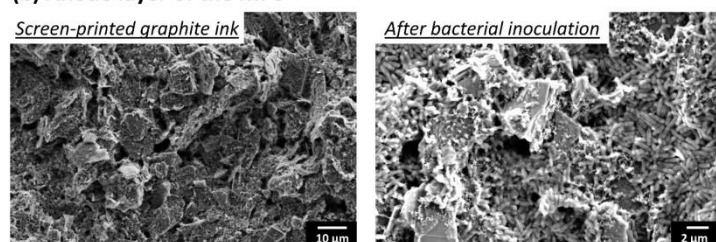

**Figure S2.** SEM images of the MFC (a) cathode and (a) anode of the screen-printed graphite ink with or without bacterial cells

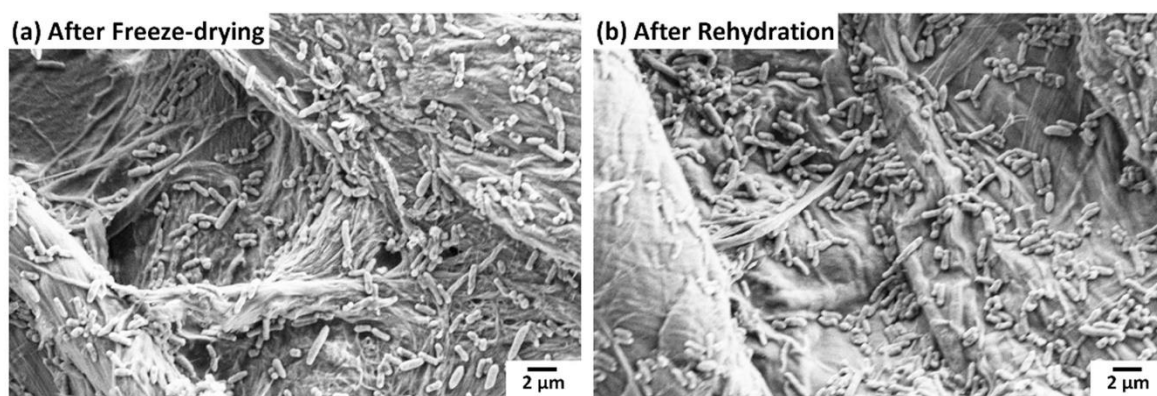

**Figure S3.** SEM images of the engineered anodic chamber after (a) freeze-drying and (b) rehydration processes

(a) *Front Side*

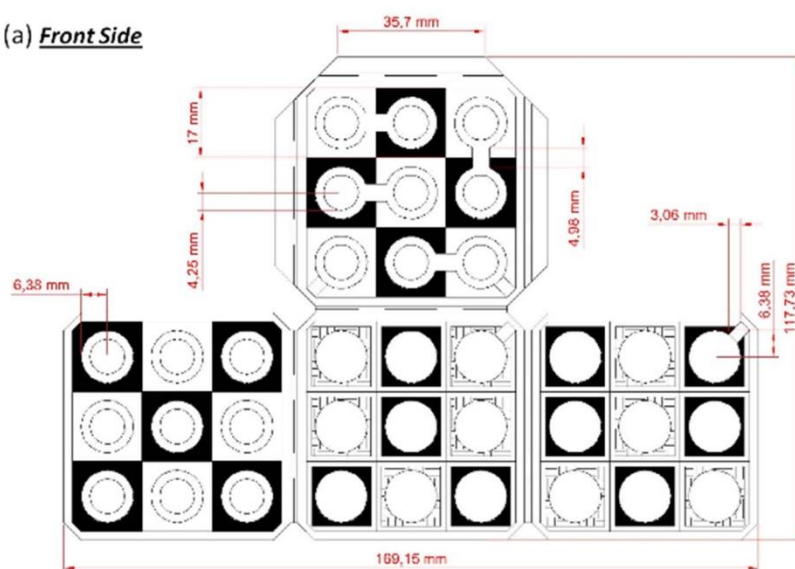

(b) *Back Side*

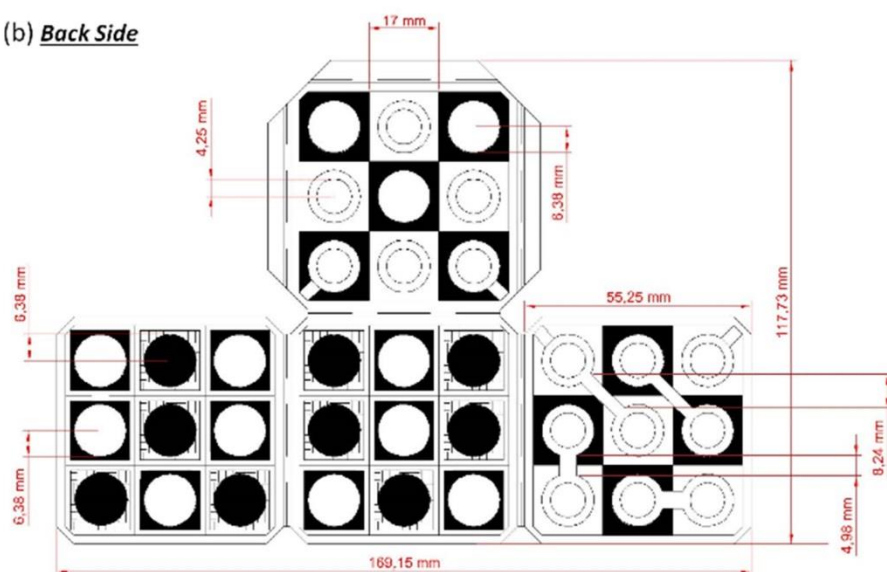

**Figure S4.** Dimensions of the nine-MFC stack
